# Supplementary material
Source: Springer Nature journal article supplement (https://www.springermedizin.de/resource/supplementary/12882_2012_364_MOESM6_ESM.pdf/9453450)

Simplified MDRD equation  
( $\text{ml}/\text{min}/1.73\text{m}^2$ )

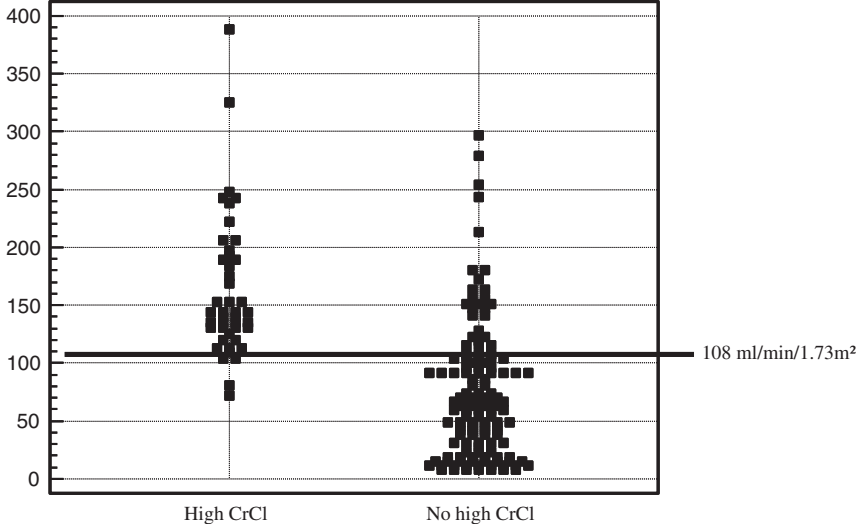

Supplement: MOESM6 [file 9453450]
